# Supplementary material
Source: publisher figshare collection journal article supplement (https://geolsoc.figshare.com/ndownloader/files/14877026)
Supplement: Supplementary file 1 [file 14877026]

## Sheet: Major element analyses
No.	1	2	3	4	5	6	7	8	9	10	11	12	13	14	15	16	17	18	19	20	21	22	23	24	25	26	27	28	29	30	31	32	33	34	35	36	37	38	39	40	41	42	43	44	45	46	47	48	49
Sample	LTS6-3-1	LTS6-3-2	LTS6-3-3	LTS6-3-4	LTS6-3-5	LTS6-3-6	LTS6-4-1	LTS6-4-2	LTS6-4-3	LTS6-4-4	LTS6-4-5	LTS6-8-1	LTS6-8-2	LTS6-5-1	LTS6-5-2	LTS6-5-3	LTS6-5-4	LTS6-5-5	LTS6-1	LTS6-2	LTS6-3	LTS6-5-6	LTS2-4-1	LTS2-4-2	LTS2-6-1	LTS2-6-2	LTS4-3-1	LTS4-1	LTS4-2	LTS4-3	LTS4-4	LTS4-2-1	LTS4-2-2	LTS14-1-1	LTS12-2	LTS5-1-1	LTS5-1-2	LTS5-1-3	LTS5-4-1	LTS5-4-2	LTS5-4-3	LTS5-4-5	LTS5-5-1	LTS5-5-2	LTS5-5-3	LTS5-5-4	LTS7-1-3	LTS7-1-4	LTS7-1-5
Type	Type I in the rhyolite porphyry													Type I in the breccia lava									Type II in the breccia lava													Type II in the cryptoexplosive breccia
wt%														Core	Core	Core	Core	Core	Rim	Rim	Rim	Core	Rim	Core	Core	Rim	Rim	Core	Rim	Core	Core	Rim	Rim	Core	Core	Core	Rim	Core	Rim	Rim	Core	Rim	Core	Rim	Core	Core	Core	Core	Core
SiO2	35.504	35.774	35.736	35.672	35.569	35.738	34.527	34.637	34.407	34.785	34.293	34.702	34.463	37.543	36.302	36.338	36.204	36.105	36.155	35.957	36.093	36.382	36.021	36.179	37.991	36.359	36.639	36.713	36.032	36.189	35.952	35.646	36.09	36.861	36.489	35.825	37.098	36.496	35.627	37.033	38.442	36.443	36.293	36.948	37.056	37.261	36.334	36.831	36.1
TiO2	0.005	0.05	b.d.l.	0.042	0.023	0.049	1.043	1.061	1.025	0.817	1.047	1.091	1.039	0.552	0.347	1.373	0.435	1.254	0.382	0.28	0.716	0.633	0.273	0.133	0.401	0.854	0.223	0.811	0.598	0.776	0.932	2.204	1.278	0.287	0.181	0.426	0.063	0.486	0.989	0.229	0.122	0.501	0.439	0.39	0.33	0.339	0.288	0.1	0.196
Al2O3	30.747	34.335	33.8	33.527	33.457	33.145	31.612	32.023	31.753	32.797	32.104	31.591	31.545	31.046	31.829	26.19	31.625	31.272	30.812	31.331	31.259	30.482	33.899	33.523	33.837	30.77	33.467	30.386	30.604	30.78	30.272	24.75	26.286	29.681	31.333	29.261	33.192	31.492	25.986	35.347	34.39	30.339	32.174	30.883	31.256	31.42	33.155	35.257	34.58
FeO	18.177	11.683	13.06	12.74	14.281	13.738	15.786	15.671	15.208	14.969	14.773	15.656	16.003	3.186	5.155	8.756	7.036	6.372	12.759	9.507	9.133	7.758	9.635	4.747	2.033	9.049	10.33	3.812	7.299	6.915	4.087	10.565	10.731	5.635	7.011	6.784	7.073	6.346	8.854	6.981	3.875	8.107	6.342	7.715	6.324	5.733	4.364	2.238	1.966
MnO	0.236	b.d.l.	b.d.l.	0.037	0.019	b.d.l.	0.012	0.024	0.023	0.009	0.005	0.026	b.d.l.	0.212	0.033	0.002	0.021	0.034	0.117	0.042	0.016	0.198	0.263	0.007	b.d.l.	0.013	b.d.l.	0.005	0.012	0.01	0.005	0.022	0.004	0.027	0.02	0.068	0.015	0.036	0.116	0.006	b.d.l.	0.039	0.015	0.022	0.05	0.042	b.d.l.	0.008	0.022
MgO	0.204	2.291	2.011	2.128	1.018	1.525	1.218	1.197	1.225	1.024	1.176	1.251	1.188	8.89	7.788	9.325	8.265	8.587	3.555	5.519	5.43	8.152	3.939	6.991	9.602	6.064	4.188	9.849	7.413	7.747	9.795	9.029	8.104	9.758	7.778	8.461	6.451	7.233	9.791	4.69	7.526	6.72	7.485	6.532	6.979	7.884	8.134	8.272	9.155
CaO	b.d.l.	0.192	0.063	0.118	0.176	0.114	0.229	0.217	0.208	0.196	0.229	0.219	0.213	1.794	0.55	1.996	1.536	0.726	0.129	0.357	0.481	1.367	0.205	0.647	0.714	0.313	0.166	1.893	0.721	0.775	2.258	1.513	1.212	1.909	0.79	1.347	0.206	0.502	1.869	0.077	0.206	0.542	0.504	0.415	0.876	0.806	0.807	0.756	0.769
Na2O	2.266	1.635	1.662	2.136	2.015	1.867	1.923	1.875	1.954	1.678	1.818	1.884	1.966	1.466	2.35	1.802	1.494	1.749	2.319	2.004	2.15	1.813	1.702	2.092	2.122	2.312	1.699	1.926	2.521	2.523	1.904	2.179	2.373	1.872	2.016	2.111	1.959	2.016	1.686	1.324	1.688	2.099	2.039	2.052	2.131	1.95	1.876	1.965	1.822
K2O	0.042	0.013	0.032	0.023	0.025	0.019	0.039	0.041	0.032	0.023	0.029	0.044	0.05	0.001	0.018	0.04	0.025	0.037	0.04	0.057	0.043	0.021	0.003	0.013	0.034	0.015	0.03	0.05	0.048	0.034	0.047	0.032	0.028	0.008	0.025	0.037	0.024	0.033	0.033	0.021	0.031	0.045	0.036	0.044	0.039	0.06	0.003	0.016	0.016
F	b.d.l.	0.192	b.d.l.	0.004	b.d.l.	0.015	0.473	0.521	0.426	0.108	0.405	0.537	0.455	0.584	b.d.l.	0.646	0.463	0.268	0.412	0.203	0.062	b.d.l.	0.112	b.d.l.	0.799	0.084	0.028	0.072	0.014	0.052	b.d.l.	0.724	0.084	0.411	0.145	0.506	0.337	0.396	0.421	0.732	0.029	0.308	0.085	0.013	0.069	0.016	0.513	0.15	0.328
Cl	b.d.l.	0.008	b.d.l.	0.001	b.d.l.	0.0012	0.006	0.002	0.001	0.013	0.008	b.d.l.	0.003	0.058	b.d.l.	b.d.l.	0.001	b.d.l.	0.011	0.012	0.011	b.d.l.	0.006	0.011	0.007	0.004	b.d.l.	0.013	0.012	0.014	0.013	0.007	0.014	b.d.l.	0.005	0.012	0.001	0.004	0.005	b.d.l.	0.016	0.005	0.011	0.008	0.016	0.017	0.007	0.002	0.012
B2O3*	10.1327	10.3659	10.3692	10.321	10.2536	10.266	10.1495	10.2064	10.0996	10.2086	10.0838	10.1656	10.1473	10.5028	10.431	10.3658	10.663	10.6671	10.2921	10.3477	10.3375	10.6125	10.4665	10.4496	10.9131	10.4147	10.5593	10.5451	10.3952	10.4731	10.469	10.2876	10.3226	10.5834	10.5473	10.3094	10.6377	10.4394	10.3233	10.6249	10.8365	10.3594	10.546	10.4103	10.4136	10.559	10.5905	10.7373	10.6961
H2O *	3.289	3.098	3.183	3.313	3.272	3.214	3.004	2.981	3.019	3.111	2.986	2.967	3.025	3.141	3.474	3.228	3.225	3.271	3.168	3.229	3.353	3.497	3.182	3.416	3.181	3.379	3.245	3.565	3.538	3.546	2.728	3.2	3.518	3.396	3.377	3.262	3.2	3.186	3.284	2.804	3.316	3.239	3.366	3.357	3.426	3.428	3.171	3.403	3.265
F=O	0	-0.081	0	-0.002	0	-0.006	-0.199	-0.219	-0.179	-0.045	-0.171	-0.226	-0.192	-0.246	0	-0.272	-0.195	-0.113	-0.173	-0.085	-0.026	0	-0.047	0	-0.336	-0.035	-0.012	-0.03	-0.006	-0.022	0	-0.305	-0.035	-0.173	-0.061	-0.213	-0.142	-0.167	-0.177	-0.308	-0.012	-0.13	-0.036	-0.005	-0.029	-0.007	-0.216	-0.063	-0.138
Cl=O	0	-0.002	0	0	0	0	0	0	0	-0.003	-0.002	0	-0.001	-0.013	0	0	0	0	-0.002	-0.003	-0.002	0	-0.001	-0.002	-0.002	-0.001	0	-0.003	-0.003	-0.003	-0.003	-0.002	-0.003	0	-0.001	-0.003	0	-0.001	-0.001	0	-0.004	-0.001	-0.002	-0.002	-0.004	-0.004	-0.002	0	-0.003
Total	100.603	99.5539	99.9162	100.06	100.109	99.6852	99.8225	100.237	99.2016	99.6906	98.7838	99.9076	99.9043	98.7168	98.277	99.7898	100.798	100.229	99.9782	98.7558	99.0573	100.915	99.6585	98.2066	101.296	99.5947	100.562	99.6071	99.1982	99.809	98.46	99.8516	100.007	100.255	99.6553	98.1934	100.115	98.4974	98.8063	99.5609	100.462	98.6154	99.297	98.7812	98.9311	99.5038	99.0245	99.6723	98.7861
Formulas normalized on T + Z + Y = 15 (Henry and Dutrow, 1996) (apfu)
T site
Si	6.08984	5.99808	5.98984	6.00704	6.02902	6.05039	5.91243	5.89823	5.92102	5.92216	5.91061	5.93301	5.90278	6.21265	6.04867	6.09269	5.901	5.88265	6.10546	6.03938	6.06819	5.9583	5.98149	6.0174	6.0504	6.06762	6.03064	6.05091	6.02436	6.00548	5.968	6.02215	6.07646	6.05336	6.01278	6.03956	6.06116	6.0761	5.99809	6.0578	6.16552	6.11411	5.98123	6.16846	6.18449	6.13317	5.96281	5.9617	5.86591
Al	0	0.00191527	0.0101625	0	0	0	0.0875667	0.101765	0.0789837	0.0778433	0.0893893	0.0669927	0.0972198	0	0	0	0.075	0.117351	0	0	0	0.0417009	0.0185131	0	0	0	0	0	0	0	0.032	0	0	0	0	0	0	0	0.0019131	0	0	0	0.0187748	0	0	0	0.0371911	0.0383032	0.134095
Z site
Al	6	6	6	6	6	6	6	6	6	6	6	6	6	6	6	5.17535	6	5.88771	6	6	6	5.84179	6	6	6	6	6	5.9024	6	6	5.891	4.92802	5.21608	5.74465	6	5.81386	6	6	5.15428	6	6	5.99896	6	6	6	6	6	6	6
Y site
Al	0.215665	0.782903	0.666845	0.65401	0.683717	0.613433	0.292356	0.325109	0.361082	0.502947	0.432029	0.298614	0.270591	0.054936	0.250406	0	0	0	0.132335	0.202075	0.193992	0	0.615806	0.571297	0.351132	0.0518801	0.49221	0	0.0305607	0.0201486	0	0	0	0	0.0851511	0	0.391377	0.179249	0	0.814515	0.50058	0	0.230482	0.0765667	0.148002	0.0952433	0.375536	0.687711	0.488206
FeTot	2.6074	1.63816	1.83066	1.79415	2.02437	1.94506	2.26066	2.23169	2.18866	2.13126	2.12937	2.2385	2.29224	0.44091	0.718313	1.22775	0.959	0.868235	1.80191	1.33536	1.28409	1.06253	1.33802	0.660279	0.270768	1.26288	1.42192	0.525397	1.02052	0.959717	0.567	1.49268	1.51098	0.77389	0.966161	0.956447	0.966417	0.883559	1.24661	0.954992	0.519747	1.13746	0.874077	1.07714	0.882627	0.789185	0.598933	0.302951	0.267157
Ti	0.00064494	0.00630429	0	0.00531867	0.00293173	0.00623835	0.134311	0.135868	0.132646	0.1046	0.135705	0.14027	0.133826	0.0686922	0.043479	0.173117	0.053	0.153647	0.0485315	0.0353907	0.0905797	0.0779579	0.0340908	0.0166351	0.0480251	0.107173	0.0276023	0.100485	0.0751722	0.0968489	0.116	0.28001	0.161814	0.0354431	0.0224291	0.0540069	0.00774045	0.0608466	0.125213	0.0281697	0.0147145	0.0632088	0.0544067	0.0489512	0.0413748	0.0420159	0.0355427	0.0121724	0.02395
Mn	0.0342868	0	0	0.0052774	0.00272781	0	0.0017405	0.00346161	0.00335246	0.00129782	0.000729932	0.00376513	0	0.0297146	0.00465724	0.00028403	0.003	0.00469213	0.0167006	0.00593087	0.00228141	0.0274654	0.0369909	0.000986134	0	0.00183754	0	0.000761242	0.00164022	0.00134196	0.001	0.00314811	0.000570439	0.00375559	0.00279144	0.00970988	0.00207578	0.00507654	0.0165416	0.000831311	0	0.00554203	0.00209384	0.00310108	0.00705399	0.00585	0	0.00109681	0.00302786
Mg	0.0521636	0.572636	0.502493	0.534211	0.257236	0.384885	0.31093	0.303868	0.314264	0.259894	0.302164	0.31885	0.303339	2.1931	1.93448	2.3308	2.008	2.08572	0.895061	1.38186	1.36086	1.99025	0.975097	1.7334	2.27968	1.5086	1.02763	2.42004	1.84775	1.91646	2.424	2.27399	2.0341	2.3889	1.91069	2.12642	1.57123	1.79517	2.45736	1.14369	1.79944	1.68072	1.83894	1.62577	1.73645	1.93454	1.98999	1.99607	2.21766
X site
Ca	0	0.0344909	0.0113138	0.0212898	0.0319628	0.0206783	0.0420146	0.0395912	0.0383504	0.0357521	0.0422883	0.0401164	0.0390878	0.318074	0.098186	0.358564	0.268	0.126736	0.0233992	0.0641973	0.0867202	0.239862	0.0364724	0.115296	0.121831	0.055964	0.0292742	0.334345	0.129078	0.137871	0.402	0.273866	0.218637	0.335887	0.139476	0.243301	0.0360603	0.0895449	0.337132	0.0134951	0.0353988	0.0974262	0.0889929	0.0741811	0.156579	0.142141	0.141896	0.13111	0.133879
Na	0.75359	0.531507	0.540115	0.697398	0.662211	0.612835	0.638459	0.619055	0.651959	0.553894	0.607529	0.624522	0.65288	0.470358	0.759178	0.5858	0.472	0.552512	0.759377	0.652454	0.700926	0.575678	0.547973	0.674622	0.655232	0.748068	0.5422	0.615417	0.817183	0.811771	0.613	0.713748	0.774654	0.596048	0.644096	0.690007	0.620563	0.650753	0.550348	0.419914	0.524907	0.682775	0.651525	0.664164	0.689699	0.622163	0.596921	0.616688	0.574014
K	0.00919045	0.00278065	0.00684254	0.00494105	0.00540597	0.0041036	0.00851982	0.00890685	0.00702519	0.00499545	0.00637652	0.00959691	0.0109253	0.000211109	0.00382613	0.00855592	0.005	0.0076907	0.0087145	0.0122359	0.0092196	0.00438746	0.000635526	0.00275838	0.00690781	0.00319342	0.0062994	0.0105435	0.0103316	0	0.01	0.00689683	0.00601423	0.00167601	0.00525547	0.00795755	0.00500236	0.00700893	0.00708771	0.00438232	0.00634285	0.00963141	0.00756882	0.00932795	0.0083146	0.0125512	0.000628084	0.00330396	0.0033167
Vacancy	0.237219	0.431221	0.441728	0.276372	0.30042	0.362383	0.311006	0.332447	0.302665	0.405359	0.343806	0.325765	0.297107	0.211357	0.13881	0.04708	0.254	0.313061	0.20851	0.271113	0.203134	0.180072	0.414919	0.207324	0.216029	0.192775	0.422226	0.0396949	0.0434076	0.0503587	-0.016	0.00549001	0.000694736	0.0663891	0.211173	0.0587339	0.338374	0.252693	0.105432	0.562208	0.433351	0.210167	0.251913	0.252327	0.145407	0.223145	0.260555	0.248898	0.28879
AlTot	6.21567	6.78482	6.67701	6.65401	6.68372	6.61343	6.37992	6.42687	6.44007	6.58079	6.52142	6.36561	6.36781	6.05494	6.25041	5.17535	6.075	6.00506	6.13233	6.20208	6.19399	5.88349	6.63432	6.5713	6.35113	6.05188	6.49221	5.9024	6.03056	6.02015	5.923	4.92802	5.21608	5.74465	6.08515	5.81386	6.39138	6.17925	5.15619	6.81451	6.50058	5.99896	6.24926	6.07657	6.148	6.09524	6.41273	6.72601	6.6223
B	3	3	3	3	3	3	3	3	3	3	3	3	3	3	3	3	3	3	3	3	3	3	3	3	3	3	3	3	3	3	3	3	3	3	3	3	3	3	3	3	3	3	3	3	3	3	3	3	3
F	0	0.102	0	0.00213028	0	0.00803134	0.256161	0.280584	0.231848	0.058	0.221	0.29	0.246	0.306	0	0.343	0.239	0.138097	0.220034	0.107833	0.0329664	0	0.059	0	0.402	0.044	0.015	0.0375302	0.00740274	0.0272913	0	0.387	0.045	0.213	0.076	0.27	0.174	0.209	0.224	0.379	0.015	0.163	0.044	0.00686399	0.0364203	0.008329	0.266	0.077	0.169
Cl	0	0.002	0	0.000285391	0	0.000344304	0.00174127	0.000577191	0.000291647	0.004	0.002	0	0.001	0.016	0	0	0.000273816	0	0.00316174	0.00328877	0.00308599	0	0.002	0.003	0.002	0.001	0	0.00360892	0.00346218	0.00402208	0.004	0.002	0.004	0	0.001	0.003	0	0.001	0.001	0	0.004	0.001	0.003	0.00235533	0.00446907	0.00473004	0.002	0.001	0.003
Mg/(Mg+Fe)	0.0196136	0.259018	0.21537	0.229437	0.112743	0.165191	0.12091	0.119842	0.125559	0.10869	0.124269	0.12468	0.116867	0.832609	0.729224	0.654986	0.676778	0.706077	0.331876	0.508556	0.514512	0.651947	0.421552	0.724158	0.893835	0.54433	0.419516	0.821623	0.644205	0.666322	0.810316	0.603714	0.57378	0.755314	0.66416	0.689754	0.619168	0.670158	0.66344	0.544956	0.775892	0.596386	0.677821	0.601488	0.663001	0.710255	0.768655	0.868226	0.892484
X/(x+Na+K)	0.237219	0.446626	0.446783	0.282383	0.310339	0.370035	0.324646	0.346151	0.314735	0.420389	0.358987	0.339379	0.309192	0.309942	0.153923	0.0733978	0.347469	0.358495	0.213506	0.289712	0.222422	0.236894	0.430625	0.234343	0.245999	0.204203	0.434959	0.0596328	0.049841	0.0584121	-0.025	0.0075606	0.000889134	0.0999665	0.245401	0.0776186	0.351033	0.277546	0.159054	0.569899	0.449254	0.232853	0.276522	0.272545	0.172402	0.260119	0.30364	0.286455	0.333429
Fe#	0.988902	0.836053	0.866565	0.856874	0.93346	0.900085	0.92837	0.929037	0.925455	0.935972	0.926265	0.926007	0.930894	0.263829	0.398285	0.484265	0.459839	0.425964	0.782072	0.632706	0.627149	0.487618	0.709813	0.404413	0.174731	0.598756	0.711531	0.279023	0.496102	0.471648	0.294424	0.539196	0.569737	0.366075	0.474069	0.444998	0.522996	0.467339	0.474873	0.598149	0.339882	0.546773	0.458668	0.541505	0.475363	0.421028	0.349176	0.21294	0.176783
* B2O3, H2O = calculated by stoichiometry; B = 3 apfu, OH+F+Cl = 4 apfu
a Total Fe as FeO
Fe# = FeO/(FeO + MgO)
[truncated: 37 more columns]
